# Supplementary material for: Pediatric rheumatology infusion center: report on therapeutic protocols and infusions given over 4 Years with focus on adverse events over 1 Year
Source: Springer Nature journal article supplement (doi:10.1186/s12969-018-0234-0), 2018-03-09
Supplement: MOESM1 [file 15523286]

**RHEUMATOLOGY ABATACEPT (Orencia) INFUSION ORDERS # \_\_\_\_**

1. Attending MD: \_\_\_\_\_
2. Diagnosis: \_\_\_\_\_
3. Weight: \_\_\_\_\_ kg
4. Diet: Regular
5. Vital Signs: q 15 min x 2, then q 30 min x 2 until infusion complete.
6. Obtain peripheral IV. LMX cream or equivalent prior to insertion PRN.
7. Labs: CBC w diff, ESR, CRP, CMP
8. Medications:
  - PREMEDS: Acetaminophen \_\_\_\_\_ mg PO (\_\_\_\_ mg/kg) PRN  
Diphenhydramine \_\_\_\_\_ mg IV/PO (\_0.5\_ mg/kg) PRN
  - ABATACEPT \_\_\_\_\_ mg (10 mg/kg, max 1000mg) IV diluted in 100 ml normal saline to run over 45 minutes or longer.
9. Stop infusion and notify MD for: SBP less than \_\_90\_\_ or greater than \_\_\_\_150\_\_\_\_  
DBP less than \_\_50\_\_ or greater than \_\_\_\_90\_\_\_\_  
Generalized hives; Fever  $\geq 101^{\circ}$  F  
Shortness of breath/wheezing;  
Nausea/vomiting/diarrhea
  - Return for next infusion in \_\_\_\_\_ week/s or abatacept infusion # \_\_\_\_

Signature \_\_\_\_\_ / \_\_\_\_\_

Date/Time: \_\_\_\_\_

**RHEUMATOLOGY: TOCILIZUMAB (Actemra) INFUSION ORDERS # \_\_\_\_**

1. Attending MD: \_\_\_\_\_
2. Diagnosis: \_\_\_\_\_
3. Weight: \_\_\_\_\_ Height: \_\_\_\_\_ cm    BSA: \_\_\_\_\_     $BSA(m^2) = \sqrt{(HT(cm) \times wt(Kg)) / 3600}$
4. Obtain peripheral IV. LMX cream or equivalent prior to insertion PRN.
5. Labs: CBC w diff, ESR, CRP, CMP, Ferritin, aldolase, D-dimer, triglycerides, total cholesterol with HDL and LDL.
6. Medications.

BEDSIDE MEDS FOR EMERGENCY USE:

Epi-pen Junior (Dose 0.1mg) if patient weight 15-30kg  
Epi-pen regular (Dose 0.3mg) if patient weight greater than 30kg  
**Diphenhydramine** \_\_\_\_\_ **mg** IV (1 mg/kg)  
**Hydrocortisone** \_\_\_\_\_ **mg** IV (2 mg/kg)

**Tocilizumab** \_\_\_\_\_ **mg** (10 mg/kg, max 1 gram) in **50** mL NS IV  
(note: round total volume up to either 50mL, 100mL, 150 mL, 250mL, or 500mL)

- Vital signs every 15 minutes x 4, then Q 1 hour until infusion completed
- Infuse over 1 hour or longer.

**Monitor for signs of adverse reaction:** urticaria, diarrhea, arthralgia, headache; dizziness, tachycardia, hypertension, hypotension, fever, vomiting, swelling of lips, tongue, or face, and airway compromise: chest tightness, increased WOB, SOB, wheezing. If symptoms:

1. Stop infusion.
  2. Notify MD/PNP of possible reaction.
  3. Give diphenhydramine \_\_\_\_\_ **mg** (1mg/kg) X 1 dose for rash, redness, or itching.
  4. Give Epi-pen IM for airway compromise or reaction involving two body systems (i.e. fever and vomiting, wheezing and rash)
- Return for next infusion in \_\_\_\_\_ week/s for Actemra # \_\_\_\_

Signature \_\_\_\_\_ / \_\_\_\_\_  
Date/Time: \_\_\_\_\_

**RHEUMATOLOGY: Belimumab (Benlysta) INFUSION ORDERS # \_\_\_\_**

1. Attending MD: \_\_\_\_\_
2. Diagnosis: \_\_\_\_\_
3. Weight: \_\_\_\_\_ kg
4. Obtain peripheral IV. LMX cream or equivalent prior to insertion PRN.
5. Labs: CBC w diff, ESR, CRP, CMP, urinalysis, Urine protein:creatinine ratio
6. Medications:

BEDSIDE MEDS FOR EMERGENCY USE:

Epi-pen Junior (Dose 0.1mg) if patient weight 15-30kg

Epi-pen regular (Dose 0.3mg) if patient weight greater than 30kg

**Diphenhydramine** \_\_\_\_\_ IV (1 mg/kg)

**Hydrocortisone** \_\_\_\_\_ IV (2 mg/kg)

- Premed: **Diphenhydramine** \_\_\_\_\_ mg (0.5mg/kg) PO 30 minutes prior to administration
- **Belimumab** \_\_\_\_\_ mg (10 mg/kg) in 250 mL NS IV
- Vital signs every 15 minutes x 4, then Q 1 hour until infusion completed
- Infuse over 1 hour or longer.

**Monitor for signs of adverse reaction: urticaria, diarrhea, arthralgia, and headache; dizziness, tachycardia, hypertension, hypotension, fever, vomiting, swelling of lips, tongue, or face, and airway compromise: chest tightness increased WOB, SOB, wheezing. If symptoms:**

5. Stop infusion.
  6. Notify MD/PNP of possible reaction.
  7. Give diphenhydramine \_\_\_\_\_ mg (1mg/kg) X 1 dose for rash, redness, or itching.
  8. Give Epi-pen IM for airway compromise or reaction involving two body systems (i.e. fever and vomiting, wheezing and rash)
- Return for next infusion in \_\_\_\_\_ week/s for Belimumab # \_\_\_\_

Signature \_\_\_\_\_ / \_\_\_\_\_

Date/Time: \_\_\_\_\_

# RHEUMATOLOGY CYCLOPHOSPHAMIDE (Cytosan) INFUSION

## ORDERS # \_\_\_\_\_

Date: \_\_\_ / \_\_\_ / \_\_\_      Time: \_\_\_\_\_      Dose: # \_\_\_\_\_

**MEASUREMENTS**

Admit Wt: \_\_\_\_\_ Kg     Measured      Ht: \_\_\_\_\_ Cm     Measured      BSA (m2): \_\_\_\_\_

|                                                                                                                                                                                                                                                                                                      |                                                                                                                                                                                                                                                                                  |
|------------------------------------------------------------------------------------------------------------------------------------------------------------------------------------------------------------------------------------------------------------------------------------------------------|----------------------------------------------------------------------------------------------------------------------------------------------------------------------------------------------------------------------------------------------------------------------------------|
| <ul style="list-style-type: none"> <li>Items with boxes must be checked to be ordered</li> <li>Strike thru must be thru entire line and must be initialed by the physician to be valid.</li> <li>The following abbreviations CANNOT be used:<br/><b>cc u IU q.d. q.o.d. MS MS04 MgSO4</b></li> </ul> | <ul style="list-style-type: none"> <li>CANNOT use trailing Zero (X.0 mg) or Leading decimal point (.X mg) (always use a leading zero)</li> <li>The metric system must be used to enter all medication orders</li> <li>All pages of order set MUST be sent to Pharmacy</li> </ul> |
|------------------------------------------------------------------------------------------------------------------------------------------------------------------------------------------------------------------------------------------------------------------------------------------------------|----------------------------------------------------------------------------------------------------------------------------------------------------------------------------------------------------------------------------------------------------------------------------------|

**ALLERGIES/SENSITIVITIES**

No Known Allergies       Latex Allergies       Latex Precautions       Unable to Obtain

| Agent  | Reaction(s)/Notes |
|--------|-------------------|
| 1.     |                   |
| 2.     |                   |
| Other: |                   |

**INDICATION FOR USE OF THIS ORDER SET – Cyclophosphamide (Cytosan®)**

Indication: \_\_\_\_\_      ICD10: \_\_\_\_\_

**PRESCRIBER RESTRICTIONS/INFORMATION**

**Labs to be drawn prior to start of infusion**

**Negative pregnancy status must be documented prior to infusion**

All cyclophosphamide orders must be signed by an attending or fellow physician

**VITALS**

| VITALS                              | DESCRIPTION                       | FREQUENCY                                                                                           | NOTIFY PRESCRIBER                                                                                                                                           | INSTRUCTIONS |
|-------------------------------------|-----------------------------------|-----------------------------------------------------------------------------------------------------|-------------------------------------------------------------------------------------------------------------------------------------------------------------|--------------|
| <input checked="" type="checkbox"/> | Vital Signs (Pulse, Respirations) | <input checked="" type="checkbox"/> Every 2 hours during infusion<br><input type="checkbox"/> _____ | <input type="checkbox"/> HR greater than ____ or less than ____<br><input type="checkbox"/> RR greater than ____ or less than ____                          |              |
| <input checked="" type="checkbox"/> | Temperature                       | <input checked="" type="checkbox"/> Every 2 hours during infusion<br><input type="checkbox"/> _____ | <input type="checkbox"/> Temp less than ____<br><input checked="" type="checkbox"/> Temp greater than _101_                                                 |              |
| <input checked="" type="checkbox"/> | Blood Pressure                    | <input checked="" type="checkbox"/> Every 2 hours during infusion<br><input type="checkbox"/> _____ | <input checked="" type="checkbox"/> SBP greater than _150_ or less than _90_<br><input checked="" type="checkbox"/> DBP greater than _90_ or less than _50_ |              |

**NURSING/TREATMENTS**

| DESCRIPTION                                           | FREQUENCY                                                                                                                                  | INSTRUCTIONS                                                              |
|-------------------------------------------------------|--------------------------------------------------------------------------------------------------------------------------------------------|---------------------------------------------------------------------------|
| <input type="checkbox"/> Intake and Output            | <input type="checkbox"/> Strict (Measure) <input type="checkbox"/> Routine (Count)<br><input type="checkbox"/> Every _____ during infusion | Notify Prescriber if UOP drops below 1 mL/kg/hr averaged over _____ hours |
| <input checked="" type="checkbox"/> Notify Prescriber | <input checked="" type="checkbox"/> For suspected medication reaction                                                                      | <input type="checkbox"/> If patient loses IV access                       |

**VASCULAR ACCESS**

| VASCULAR ACCESS                                                                                                                           | INSTRUCTIONS                                 | COMMENTS             |
|-------------------------------------------------------------------------------------------------------------------------------------------|----------------------------------------------|----------------------|
| <input checked="" type="checkbox"/> Peripheral IV <input checked="" type="checkbox"/> Insert <input checked="" type="checkbox"/> Maintain | Saline lock when not in use                  | Site care per policy |
| <input type="checkbox"/> Central Vascular Access                                                                                          | <b>See Central Vascular Access Order Set</b> |                      |

**MEDICATIONS FOR VASCULAR ACCESS**

| MEDICATIONS FOR VASCULAR ACCESS     | MEDICATION NAME          | DOSE                            | ROUTE                         | FREQUENCY                            | INSTRUCTIONS                                              |
|-------------------------------------|--------------------------|---------------------------------|-------------------------------|--------------------------------------|-----------------------------------------------------------|
| <input checked="" type="checkbox"/> | Lidocaine 4% Cream (LMX) | 1 Application (Dispense 1 tube) | Topical-skin (procedure site) | PRN venipuncture (max every 2 hours) | Apply 30 minutes before procedure with occlusive dressing |

\_\_\_\_\_  
Licensed Independent Practitioner Initials (Prescriber)

\_\_\_\_\_  
RN SIGNATURE DATE/TIME

1 of 3

**\*DT0077\***

**MEDICATION ORDER  
CYCLOPHOSPHAMIDE  
(CYTOXAN®) INFUSION  
NON-ONCOLOGY  
USE ONLY**

Form#0039

**STANDARD ADMINISTRATION TIMES**

|                          |                                      |                                                       |
|--------------------------|--------------------------------------|-------------------------------------------------------|
| Daily 0800               | Nightly 2100                         | Every 3 hours 0000-0300-0600-0900-1200-1500-1800-2100 |
| Twice a day 0800-2000    | Three times a day 0800-1400-2000     | Every 4 hours 0000-0400-0800-1200-1600-2000           |
| Every 12 hours 0800-2000 | Four times a day 0800-1200-1600-2000 | Every 6 hours 0200-0800-1400-2000                     |
|                          |                                      | Every 8 hours 0000-0800-1600                          |

**IV FLUIDS (must specify 'Amount To Infuse' OR 'Infusion Rate')**

| FLUID TYPE                                   | ADDITIVES | ROUTE | AMOUNT TO INFUSE | INFUSION RATE                              | INFUSE OVER                                                             |
|----------------------------------------------|-----------|-------|------------------|--------------------------------------------|-------------------------------------------------------------------------|
| <b>IV Maintenance/Other</b>                  |           |       |                  |                                            |                                                                         |
| <input checked="" type="checkbox"/> D5W ½ NS |           | IV    |                  | _____ mL/hr<br>(125 mL/m <sup>2</sup> /hr) | Infuse for one hour prior to cyclophosphamide infusion and 3 hours post |

**PRE-MEDICATION ORDERS**

| MEDICATION NAME<br>(GENERIC PREFERRED)                       | DEFAULT<br>(REFERENCE)          | DOSE | ROUTE | FREQUENCY | DURATION | PRIORITY | INSTRUCTIONS<br>(IF PRN – INDICATION IS REQUIRED) |
|--------------------------------------------------------------|---------------------------------|------|-------|-----------|----------|----------|---------------------------------------------------|
| <input checked="" type="checkbox"/> Ondansetron<br>(Zofran®) | 0.45 mg/kg<br>(Max: 24 mg/dose) |      | IV    | ONCE      |          |          | 30 minutes prior to infusion                      |

**CYCLOPHOSPHAMIDE - INFUSION AND ADMINISTRATION INSTRUCTIONS**

|                                                                 |                                          |  |    |               |         |  |                                                                                                                                 |
|-----------------------------------------------------------------|------------------------------------------|--|----|---------------|---------|--|---------------------------------------------------------------------------------------------------------------------------------|
| <input checked="" type="checkbox"/> Mesna                       | 30% of cyclophosphamide dose             |  | IV | Every 4 hours | 2 doses |  | 1 <sup>st</sup> dose – 15 minutes prior to infusion<br>2 <sup>nd</sup> dose - 3 hours after infusion<br>(Round to nearest 10mg) |
| <input checked="" type="checkbox"/> Cyclophosphamide (Cytosan®) | _____ <b>750</b> _____ mg/m <sup>2</sup> |  | IV | ONCE          |         |  | Pharmacy note: Dilute in NS<br><b>Infuse cyclophosphamide over 1 hour.</b>                                                      |

**LABS-**

| NAME OF TEST                                                                 | PRIORITY | FREQUENCY | DURATION | INSTRUCTIONS/PRN INDICATIONS                                                                                |
|------------------------------------------------------------------------------|----------|-----------|----------|-------------------------------------------------------------------------------------------------------------|
| <input checked="" type="checkbox"/> Complete Blood Count with differential   | Routine  | Once      |          | Obtain prior to start of infusion.                                                                          |
| <input checked="" type="checkbox"/> Comprehensive Metabolic Panel            | Routine  | Once      |          | Obtain prior to start of infusion.                                                                          |
| <input type="checkbox"/> Phosphorus                                          | Routine  |           |          | Obtain prior to start of infusion.                                                                          |
| <input checked="" type="checkbox"/> C-reactive protein                       | Routine  | Once      |          | Obtain prior to start of infusion.                                                                          |
| <input checked="" type="checkbox"/> Erythrocyte Sedimentation Rate           | Routine  | Once      |          | Obtain prior to start of infusion.                                                                          |
| <input checked="" type="checkbox"/> Urine pregnancy                          | Routine  | Once      |          | Obtain prior to start of infusion.<br><b>Negative pregnancy status must be documented prior to infusion</b> |
| <input checked="" type="checkbox"/> Urinalysis                               | Routine  | Once      |          | Obtain prior to start of infusion.                                                                          |
| <input checked="" type="checkbox"/> Urine Protein/Creatinine                 | Routine  | Once      |          | Obtain prior to start of infusion.                                                                          |
| <input checked="" type="checkbox"/> Complement C3                            | Routine  | Once      |          | Obtain prior to start of infusion.                                                                          |
| <input checked="" type="checkbox"/> Complement C4                            | Routine  | Once      |          | Obtain prior to start of infusion.                                                                          |
| <input checked="" type="checkbox"/> dsDNA (DNA double strand Antibody level) | Routine  | Once      |          | Obtain prior to start of infusion.<br>Reference lab                                                         |

\_\_\_\_\_  
Licensed Independent Practitioner Initials (Prescriber)

\_\_\_\_\_  
RN SIGNATURE DATE/TIME

# \*DT0077\*

**MEDICATION ORDER**  
*CYCLOPHOSPHAMIDE*  
*(CYTOXAN®) INFUSION*  
**NON-ONCOLOGY  
USE ONLY**

[Empty rectangular box for additional information or notes]

Form#0039

| STANDARD ADMINISTRATION TIMES |                                      |                                                       |
|-------------------------------|--------------------------------------|-------------------------------------------------------|
| Daily 0800                    | Nightly 2100                         | Every 3 hours 0000-0300-0600-0900-1200-1500-1800-2100 |
| Twice a day 0800-2000         | Three times a day 0800-1400-2000     | Every 4 hours 0000-0400-0800-1200-1600-2000           |
| Every 12 hours 0800-2000      | Four times a day 0800-1200-1600-2000 | Every 6 hours 0200-0800-1400-2000                     |
|                               |                                      | Every 8 hours 0000-0800-1600                          |

| OTHER ORDERS                                                                      |              |
|-----------------------------------------------------------------------------------|--------------|
| DESCRIPTION                                                                       | INSTRUCTIONS |
| <input checked="checked" type="checkbox"/> Return for next infusion in ____ weeks |              |
| <input checked="checked" type="checkbox"/> CBC 14 days after infusion.            |              |
| <input type="checkbox"/>                                                          |              |

-----DO NOT WRITE BELOW THIS LINE -- IF YOU NEED ADDITIONAL ORDERS, PLEASE USE PHYSICIAN ORDER SHEET-----

\_\_\_\_\_  
**Print Name                                                Ordering Practitioner’s Signature                        Date/Time                                                Beeper Number**

\_\_\_\_\_  
**Print Name                                                (Co-Signature) Practitioner’s Signature                        Date/Time                                                Beeper Number**

\*\*Attending Co-signature if NP/Resident has ordered drug\*\*

\_\_\_\_\_  
**Licensed Independent Practitioner Initials (Prescriber)**

\_\_\_\_\_  
**RN SIGNATURE DATE/TIME**

# RHEUMATOLOGY INFLIXIMAB (Remicade) INFUSION ORDERS # \_\_\_\_

**Date:** \_\_\_\_ / \_\_\_\_ / \_\_\_\_ **Time:** \_\_\_\_ **Dose #** \_\_\_\_

| MEASUREMENTS                                                                                                                                                                                                                                                                                         |                                                                                                                                                                                                                                                                                  |
|------------------------------------------------------------------------------------------------------------------------------------------------------------------------------------------------------------------------------------------------------------------------------------------------------|----------------------------------------------------------------------------------------------------------------------------------------------------------------------------------------------------------------------------------------------------------------------------------|
| <b>Admit Wt:</b> ____ <b>Kg</b> <input checked="" type="checkbox"/> Measured                                                                                                                                                                                                                         | <b>Ht:</b> ____ <b>Cm</b> <input checked="" type="checkbox"/> Measured                                                                                                                                                                                                           |
| <ul style="list-style-type: none"> <li>Items with boxes must be checked to be ordered</li> <li>Strike thru must be thru entire line and must be initialed by the physician to be valid.</li> <li>The following abbreviations CANNOT be used:<br/><b>cc u IU q.d. q.o.d. MS MS04 MgSO4</b></li> </ul> | <ul style="list-style-type: none"> <li>CANNOT use trailing Zero (X.0 mg) or Leading decimal point (.X mg) (always use a leading zero)</li> <li>The metric system must be used to enter all medication orders</li> <li>All pages of order set MUST be sent to Pharmacy</li> </ul> |

| ALLERGIES/SENSITIVITIES                     |                                          |                                            |                                           |
|---------------------------------------------|------------------------------------------|--------------------------------------------|-------------------------------------------|
| <input type="checkbox"/> No Known Allergies | <input type="checkbox"/> Latex Allergies | <input type="checkbox"/> Latex Precautions | <input type="checkbox"/> Unable to Obtain |
| Agent                                       | Reaction(s)/Notes                        |                                            |                                           |
| 1.                                          |                                          |                                            |                                           |
| 2.                                          |                                          |                                            |                                           |
| <b>Other:</b>                               |                                          |                                            |                                           |

| INDICATION FOR USE OF THIS ORDER SET – Infliximab (Remicade®) |
|---------------------------------------------------------------|
| Indication:            ICD 10 -                               |

| ADMINISTRATION RESTRICTIONS/INFORMATION                                                                                   |
|---------------------------------------------------------------------------------------------------------------------------|
| <b>Patient must have negative result of TB skin test on file (within last 12 months) prior to infusion (see Logician)</b> |

| VITALS                              |                                                                                                                                                                 |                                                                                                                                                                                                                          |                                                                                                                                                                                                   |              |
|-------------------------------------|-----------------------------------------------------------------------------------------------------------------------------------------------------------------|--------------------------------------------------------------------------------------------------------------------------------------------------------------------------------------------------------------------------|---------------------------------------------------------------------------------------------------------------------------------------------------------------------------------------------------|--------------|
|                                     | DESCRIPTION                                                                                                                                                     | FREQUENCY                                                                                                                                                                                                                | NOTIFY PRESCRIBER                                                                                                                                                                                 | INSTRUCTIONS |
| <input checked="" type="checkbox"/> | Vital Signs<br><input checked="" type="checkbox"/> Pulse<br><input checked="" type="checkbox"/> Respirations<br><input checked="" type="checkbox"/> Temperature | <input checked="" type="checkbox"/> Every 10 minutes x 2, then every 30 minutes x 2, then hourly until infusion completes<br><input type="checkbox"/> Every 15 minutes during infusion<br><input type="checkbox"/> _____ | <input checked="" type="checkbox"/> Temp greater than 101°F<br><input type="checkbox"/> HR greater than ____ or less than ____<br><input type="checkbox"/> RR greater than ____ or less than ____ |              |
| <input checked="" type="checkbox"/> | Blood Pressure                                                                                                                                                  | <input checked="" type="checkbox"/> Every 10 minutes x 2, then every 30 minutes x 2, then hourly until infusion completes<br><input type="checkbox"/> Every 15 minutes during infusion<br><input type="checkbox"/> _____ | <input checked="" type="checkbox"/> SBP greater than __ 150__ or less than __ 90__<br><input checked="" type="checkbox"/> DBP greater than __ 90__ or less than __ 50__                           |              |

| NURSING/TREATMENTS                  |                                                |                                                                                                                                                                                                                                                                      |                                                                          |
|-------------------------------------|------------------------------------------------|----------------------------------------------------------------------------------------------------------------------------------------------------------------------------------------------------------------------------------------------------------------------|--------------------------------------------------------------------------|
|                                     | DESCRIPTION                                    | FREQUENCY                                                                                                                                                                                                                                                            | INSTRUCTIONS                                                             |
| <input type="checkbox"/>            | Intake and Output                              | <input type="checkbox"/> Strict (Measure) <input type="checkbox"/> Routine (Count)<br><input type="checkbox"/> Every ____ during infusion                                                                                                                            | Notify Prescriber if UOP drops below 1 mL/kg/hr averaged over ____ hours |
| Description                         |                                                | Instructions                                                                                                                                                                                                                                                         |                                                                          |
| <input type="checkbox"/>            | Notify prescriber                              | prior to starting infusion                                                                                                                                                                                                                                           |                                                                          |
| <input checked="" type="checkbox"/> | Notify Prescriber                              | <input checked="" type="checkbox"/> For suspected medication reaction (generalized hives; shortness of breath/wheezing; nausea/vomiting/diarrhea)<br><input type="checkbox"/> If patient loses IV access<br><input type="checkbox"/> Severe muscle aches or headache |                                                                          |
| <input type="checkbox"/>            | Please schedule next appointment for infusion: | _____ weeks                                                                                                                                                                                                                                                          |                                                                          |

\_\_\_\_\_  
Licensed Independent Practitioner Initials (Prescriber)

\_\_\_\_\_  
RN SIGNATURE DATE/TIME

# \*DT0077\*

## MEDICATION ORDER INFLIXIMAB (REMICADE®)

Form#0047

**STANDARD ADMINISTRATION TIMES**Daily 0800  
Twice a day 0800-2000  
Every 12 hours 0800-2000  
Nightly 2100  
Three times a day 0800-1400-2000  
Four times a day 0800-1200-1600-2000Every 3 hours 0000-0300-0600-0900-1200-1500-1800-2100  
Every 4 hours 0000-0400-0800-1200-1600-2000  
Every 6 hours 0200-0800-1400-2000  
Every 8 hours 0000-0800-1600**VASCULAR ACCESS** Peripheral IV  Insert  Maintain Central Vascular Access**INSTRUCTIONS**

Saline lock when not in use

 See Central Vascular Access Order Set**COMMENTS****MEDICATIONS FOR VASCULAR ACCESS**

| MEDICATION NAME                                              | DOSE                            | ROUTE                         | FREQUENCY                            | INSTRUCTIONS                                              |
|--------------------------------------------------------------|---------------------------------|-------------------------------|--------------------------------------|-----------------------------------------------------------|
| <input checked="" type="checkbox"/> Lidocaine 4% Cream (LMX) | 1 Application (Dispense 1 tube) | Topical-skin (procedure site) | PRN venipuncture (max every 2 hours) | Apply 30 minutes before procedure with occlusive dressing |

**PRE-MEDICATION ORDERS**

| MEDICATION NAME (GENERIC PREFERRED)                       | DEFAULT (REFERENCE)                                            | DOSE | ROUTE                                                                 | FREQUENCY | DURATION | PRIORITY | INSTRUCTIONS (IF PRN - INDICATION IS REQUIRED) |
|-----------------------------------------------------------|----------------------------------------------------------------|------|-----------------------------------------------------------------------|-----------|----------|----------|------------------------------------------------|
| <input checked="" type="checkbox"/> Acetaminophen         | 10 -15 mg/kg/dose (Max: 90 mg/kg/ day; ADULT MAX 4,000 mg/day) |      | <input checked="" type="checkbox"/> PO<br><input type="checkbox"/> PR | Once      |          |          | Give 30 minutes prior to infusion              |
| <input checked="" type="checkbox"/> Diphenhydramine       | 0.5-1 mg/kg/dose (Max: 50mg/dose)                              |      | <input checked="" type="checkbox"/> PO<br><input type="checkbox"/> IV | PRN       |          |          | Give 30 minutes prior to infusion              |
| <input type="checkbox"/> Hydrocortisone                   | 1-2 mg/kg/dose (Max: 100mg/dose)                               |      | IV                                                                    | Once      |          |          |                                                |
| <input type="checkbox"/> Methylprednisolone (Solumedrol®) | 1-2mg/kg/dose (Max: 100mg/dose)                                |      | IV                                                                    | Once      |          |          |                                                |

**EMERGENCY MEDICATION ORDERS**

| MEDICATION NAME (GENERIC PREFERRED)                                                                                             | DEFAULT (REFERENCE)               | DOSE                                                                                    | ROUTE | FREQUENCY | DURATION | PRIORITY | INSTRUCTIONS (IF PRN - INDICATION IS REQUIRED)                                            |
|---------------------------------------------------------------------------------------------------------------------------------|-----------------------------------|-----------------------------------------------------------------------------------------|-------|-----------|----------|----------|-------------------------------------------------------------------------------------------|
| <input checked="" type="checkbox"/> Diphenhydramine                                                                             | 0.5-1 mg/kg/dose (Max: 50mg/dose) |                                                                                         | IV    | Once PRN  |          |          | * For treatment of anaphylaxis reactions with Infliximab.**<br>**Must notify prescriber** |
| <input checked="" type="checkbox"/> Epinephrine 1:1000 (EPIPEN® -0.3mg, EPIPEN JR® - 0.15mg)<br>**Reserved for outpatient use** |                                   | <input type="checkbox"/> 0.15 mg (10-25 kg)<br><input type="checkbox"/> 0.3 mg (>25 kg) | IM    | Once PRN  |          |          | * For treatment of anaphylaxis reactions with Infliximab.**<br>**Must notify prescriber** |

Licensed Independent Practitioner Initials (Prescriber)

RN SIGNATURE DATE/TIME

2 of 3



**\*DT0077\***

**MEDICATION ORDER**  
*INFLIXIMAB (REMICADE®)*

Form#0047

**STANDARD ADMINISTRATION TIMES**

Daily 0800                      Nightly 2100  
Twice a day 0800-2000      Three times a day 0800-1400-2000  
Every 12 hours 0800-2000    Four times a day 0800-1200-1600-2000

Every 3 hours 0000-0300-0600-0900-1200-1500-1800-2100  
Every 4 hours 0000-0400-0800-1200-1600-2000  
Every 6 hours 0200-0800-1400-2000  
Every 8 hours 0000-0800-1600

**MEDICATION INFUSION ORDERS**

|                                     | MEDICATION NAME<br>(GENERIC<br>PREFERRED)                                   | DEFAULT<br>(REFERENCE) | DOSE | ROUTE | FREQUENCY | DURATION                                                   | PRIORITY | INSTRUCTIONS<br>(IF PRN – INDICATION IS<br>REQUIRED)                                                                            |
|-------------------------------------|-----------------------------------------------------------------------------|------------------------|------|-------|-----------|------------------------------------------------------------|----------|---------------------------------------------------------------------------------------------------------------------------------|
| <input checked="" type="checkbox"/> | Infliximab<br>(Remicade®)                                                   | 3-20<br>mg/kg/dose     |      | IV    | Once      | Infuse<br>over<br><u>2</u> hours<br>(normal 2-<br>4 hours) |          | Begin infusion at<br>0.1mL/kg/hr and advance<br>to maintenance after 10<br>minutes<br><b>Round to nearest 50mg<br/>or 100mg</b> |
| <input type="checkbox"/>            | <b>Methylprednisolone Pulse Infusion (Please see appropriate order set)</b> |                        |      |       |           |                                                            |          |                                                                                                                                 |

**LABS (Drug levels and Coags should not be routinely drawn from central line)**

|                                     | NAME OF TEST                                        | PRIORITY | FREQUENCY | DURATION | INSTRUCTIONS/PRN INDICATIONS       |
|-------------------------------------|-----------------------------------------------------|----------|-----------|----------|------------------------------------|
| <input checked="" type="checkbox"/> | Complete Blood Count with automated<br>differential | Routine  | Once      |          | Obtain prior to start of infusion. |
| <input checked="" type="checkbox"/> | Complete Metabolic Panel                            | Routine  | Once      |          | Obtain prior to start of infusion. |
| <input checked="" type="checkbox"/> | C-reactive Protein (CRP)                            | Routine  | Once      |          | Obtain prior to start of infusion. |
| <input checked="" type="checkbox"/> | Erythrocyte Sedimentation Rate (ESR)                | Routine  | Once      |          | Obtain prior to start of infusion. |
|                                     |                                                     | Routine  | Once      |          | Obtain prior to start of infusion. |

**OTHER ORDERS**

|                          | DESCRIPTION | INSTRUCTIONS |
|--------------------------|-------------|--------------|
| <input type="checkbox"/> |             |              |
| <input type="checkbox"/> |             |              |
| <input type="checkbox"/> |             |              |

Print Name

Ordering Practitioner's Signature

Date/Time

Beeper Number

Licensed Independent Practitioner Initials (Prescriber)

RN SIGNATURE DATE/TIME

# RHEUMATOLOGY IMMUNE GLOBULIN (IVIg) INFUSION ORDERS #

Date: \_\_\_ / \_\_\_ / \_\_\_ Time: \_\_\_\_\_

## MEASUREMENTS

Admit Wt: \_\_\_ Kg  Measured Ht: \_\_\_ Cm  Measured

- Items with boxes must be checked to be ordered
- Strike thru must be thru entire line and must be initialed by the physician to be valid.
- The following abbreviations CANNOT be used:  
**cc u IU q.d. q.o.d. MS MS04 MgSO4**
- CANNOT use trailing Zero (X.0 mg) or Leading decimal point (.X mg) (always use a leading zero)
- The metric system must be used to enter all medication orders
- All pages of order set MUST be sent to Pharmacy

## ALLERGIES/SENSITIVITIES

No Known Allergies  Latex Allergies  Latex Precautions  Unable to Obtain

| Agent | Reaction(s)/Notes |
|-------|-------------------|
| 1.    |                   |
| 2.    |                   |

Other: \_\_\_\_\_

## INDICATION FOR USE OF THIS ORDER SET – Intravenous Immune Globulin

Indication: \_\_\_\_\_

## MEDICATIONS --

|                                     | MEDICATION NAME (GENERIC PREFERRED) | DEFAULT (REFERENCE)                 | DOSE | ROUTE                                                      | FREQUENCY                                                       | DURATION | PRIORITY | INSTRUCTIONS (IF PRN – INDICATION IS REQUIRED)                                 |
|-------------------------------------|-------------------------------------|-------------------------------------|------|------------------------------------------------------------|-----------------------------------------------------------------|----------|----------|--------------------------------------------------------------------------------|
| <input checked="" type="checkbox"/> | Acetaminophen                       | 10 -15 mg/kg/dose (Max 650 mg/dose) |      | PO                                                         | <input type="checkbox"/> Once<br><input type="checkbox"/> _____ |          |          | Give 30 minutes prior to infusion<br><br><input type="checkbox"/> PRN for IVIG |
| <input checked="" type="checkbox"/> | Diphenhydramine                     | 0.5-1 mg/kg/dose (Max: 50mg)        |      | <input type="checkbox"/> PO<br><input type="checkbox"/> IV | <input type="checkbox"/> Once<br><input type="checkbox"/> _____ |          |          | Give 30 minutes prior to infusion<br><br><input type="checkbox"/> PRN for IVIG |

## EMERGENCY MEDICATION ORDERS

|                                     |                                                                                                                    |                                                                 |                                                                                         |    |                                                                     |  |  |                                                                                                                                                 |
|-------------------------------------|--------------------------------------------------------------------------------------------------------------------|-----------------------------------------------------------------|-----------------------------------------------------------------------------------------|----|---------------------------------------------------------------------|--|--|-------------------------------------------------------------------------------------------------------------------------------------------------|
| <input checked="" type="checkbox"/> | Diphenhydramine                                                                                                    | 0.5-1 mg/kg/dose (Max: 50mg)                                    |                                                                                         | IV | <input type="checkbox"/> Once PRN<br><input type="checkbox"/> _____ |  |  | <b>* Epinephrine should be immediately available for treatment of anaphylaxis reactions with IVIG.</b><br><input type="checkbox"/> PRN for IVIG |
| <input checked="" type="checkbox"/> | Epinephrine 1:1000 ( <b>EPIPEN®</b> - 0.3mg, <b>EPIPEN JR®</b> - 0.15mg)<br><b>**Reserved for outpatient use**</b> | 0.01 mg/kg/ dose (0.01mL/ kg/ dose)<br>Max dose: 0.5mg or 0.5mL | <input type="checkbox"/> 0.15 mg (10-25 kg)<br><input type="checkbox"/> 0.3 mg (>25 kg) | IM | Once PRN                                                            |  |  | <b>* Epinephrine should be immediately available for treatment of anaphylaxis reactions with IVIG.</b><br><input type="checkbox"/> PRN for IVIG |

\_\_\_\_\_  
Licensed Independent Practitioner Initials (Prescriber)

\_\_\_\_\_  
RN SIGNATURE DATE/TIME

**\*DT0077\***

**MEDICATION ORDER**

IVIG

Form#0027

**STANDARD ADMINISTRATION TIMES**

Daily 0800  
Twice a day 0800-2000  
Every 12 hours 0800-2000

Nightly 2100  
Three times a day 0800-1400-2000  
Four times a day 0800-1200-1600-2000

Every 3 hours 0000-0300-0600-0900-1200-1500-1800-2100  
Every 4 hours 0000-0400-0800-1200-1600-2000  
Every 6 hours 0200-0800-1400-2000  
Every 8 hours 0000-0800-1600

**MEDICATIONS --**

|                          | MEDICATION NAME (GENERIC PREFERRED)                                                                                                                                                                                | DEFAULT (REFERENCE) | DOSE | ROUTE | FREQUENCY                                                       | DURATION | PRIORITY | INSTRUCTIONS (IF PRN – INDICATION IS REQUIRED)                                                               |
|--------------------------|--------------------------------------------------------------------------------------------------------------------------------------------------------------------------------------------------------------------|---------------------|------|-------|-----------------------------------------------------------------|----------|----------|--------------------------------------------------------------------------------------------------------------|
| <input type="checkbox"/> | Immune Globulin<br><input type="checkbox"/> Gammagard®<br><input type="checkbox"/> Gamunex®                                                                                                                        | <b>2gm/kg</b>       |      | IV    | <input type="checkbox"/> Once<br><input type="checkbox"/> _____ |          |          | Round to nearest 5 Grams<br><b>**Please see infusion instructions**</b>                                      |
| <input type="checkbox"/> | Immune Globulin ( <b>Non-formulary Brand</b> , must specify)<br><input type="checkbox"/> PolyGam<br><input type="checkbox"/> Octagam<br><input type="checkbox"/> Carimmune NF<br><input type="checkbox"/> Privigen |                     |      | IV    | <input type="checkbox"/> Once<br><input type="checkbox"/> _____ |          |          | <b>Contact immunology or pharmacy for appropriate rate.</b><br><br>*Non-formulary request must be submitted* |
| <input type="checkbox"/> | <b>Methylprednisolone Pulse Infusion (Please see appropriate order set)</b>                                                                                                                                        |                     |      |       |                                                                 |          |          |                                                                                                              |

**INFUSION AND ADMINISTRATION INSTRUCTIONS for IVIG (Please refer to appendix for detailed administration information)**

Begin infusion at \_\_\_\_\_ ml/hr. (0.6ml/kg/hr) for 15-30 minutes  
If no adverse reaction, increase to \_\_\_\_\_ ml/hr. (1.2 ml/kg/hr) for 15-30 minutes  
If no adverse reaction, increase to \_\_\_\_\_ ml/hr.(2.4-ml/kg/hr) for 15-30 minutes  
If no adverse reaction, increase to \_\_\_\_\_ ml/hr.(3.6-ml/kg/hr) for 15-30 minutes  
If no adverse reaction, increase to \_\_\_\_\_ ml/hr.(4.8-ml/kg/hr) until complete

**OTHER ORDERS**

|                                     | DESCRIPTION                             | INSTRUCTIONS                                                    |
|-------------------------------------|-----------------------------------------|-----------------------------------------------------------------|
| <input checked="" type="checkbox"/> | Notify Prescriber                       | For suspected medication reaction or if patient loses IV access |
| <input checked="" type="checkbox"/> | Return for next infusion in _____ weeks |                                                                 |
| <input checked="" type="checkbox"/> | Labs:                                   |                                                                 |

**Appendix to Intravenous Immune Globulin (IVIG) Medication Order Set – This section is to be used as a reference for administration.**

1. IVIG solutions should be brought to room temperature before administration: should not be shaken or mixed with any other drugs or blood products.
2. All IVIG brands may be filtered but only Polygram® S/D, Gammagard® S/D, and Iveegam EN require filtration. A 15 micron filter is recommended, but flow may be hindered.
3. Infusion rate should begin at 0.01 ml/kg/minute (0.6ml/kg/hr) for 15 to 30 minutes, then the rate may be increased to 0.02ml/kg/minute (1.2ml/kg/hr). Most patients will then tolerate a gradual increase to 0.04-0.08 ml/kg/minute (2.4-3.6ml/kg/hr).
4. The compatibility of IVIG with IV fluids is product dependent. Contact Pharmacy for information on specific brands.
5. Adverse reactions are generally rate related and may be eliminated by decreasing the rate or stopping the infusion and/or giving acetaminophen, aspirin, and diphenhydramine.

**Adverse reactions include:**

**URTICARIA    FEVER    FLUSHING    FATIGUE    MUSCULAR PAIN    HEADACHE    CHILLS**  
**WHEEZING    DYSPNEA    \* POSSIBLY ANAPHYLAXIS**

-----DO NOT WRITE BELOW THIS LINE – IF YOU NEED ADDITIONAL ORDERS, PLEASE USE PHYSICIAN ORDER SHEET-----

**Print Name** \_\_\_\_\_ **Ordering Practitioner's Signature** \_\_\_\_\_ **Date/Time** \_\_\_\_\_ **Beeper** \_\_\_\_\_

**Number** \_\_\_\_\_  
**Licensed Independent Practitioner Initials (Prescriber)** \_\_\_\_\_ **RN SIGNATURE DATE/TIME** \_\_\_\_\_

# RHEUMATOLOGY METHYLPREDNISOLONE (Solumedrol) INFUSION ORDERS # \_\_\_\_\_

Date: \_\_\_\_ / \_\_\_\_ / \_\_\_\_ Time: 1300

**MEASUREMENTS**

Admit Wt: \_\_\_\_\_ Kg  Measured Ht: \_\_\_\_\_ Cm  Measured

- |                                                                                                                                                                                                                                                                                               |                                                                                                                                                                                                                                                                                  |
|-----------------------------------------------------------------------------------------------------------------------------------------------------------------------------------------------------------------------------------------------------------------------------------------------|----------------------------------------------------------------------------------------------------------------------------------------------------------------------------------------------------------------------------------------------------------------------------------|
| <ul style="list-style-type: none"> <li>Items with boxes must be checked to be ordered</li> <li>Strike thru must be thru entire line and must be initialed by the physician to be valid.</li> <li>The following abbreviations CANNOT be used:<br/>cc u IU q.d. q.o.d. MS MS04 MgSO4</li> </ul> | <ul style="list-style-type: none"> <li>CANNOT use trailing Zero (X.0 mg) or Leading decimal point (.X mg) (always use a leading zero)</li> <li>The metric system must be used to enter all medication orders</li> <li>All pages of order set MUST be sent to Pharmacy</li> </ul> |
|-----------------------------------------------------------------------------------------------------------------------------------------------------------------------------------------------------------------------------------------------------------------------------------------------|----------------------------------------------------------------------------------------------------------------------------------------------------------------------------------------------------------------------------------------------------------------------------------|

**ALLERGIES/SENSITIVITIES**

No Known Allergies  Latex Allergies  Latex Precautions  Unable to Obtain

| Agent | Reaction(s)/Notes |
|-------|-------------------|
| 1.    |                   |
| 2.    |                   |

Other:

**INDICATION FOR USE OF THIS ORDER SET – METHYLPREDNISOLONE (SOLU-MEDROL®) PULSE DOSE INFUSION**

Indication (required): ICD10 - \_\_\_\_\_

**NURSING ORDERS**

| DESCRIPTION                                           | INSTRUCTIONS                                                                                              |
|-------------------------------------------------------|-----------------------------------------------------------------------------------------------------------|
| <input checked="" type="checkbox"/> Notify Prescriber | For suspected medication reaction if patient loses IV access, or any acute changes in patient's condition |

**VASCULAR ACCESS**

| VASCULAR ACCESS                                                                                                                           | INSTRUCTIONS                | COMMENTS |
|-------------------------------------------------------------------------------------------------------------------------------------------|-----------------------------|----------|
| <input checked="" type="checkbox"/> Peripheral IV <input checked="" type="checkbox"/> Insert <input checked="" type="checkbox"/> Maintain | Saline lock when not in use |          |
| <input type="checkbox"/> See Supportive Care Central Line (Excluding Dialysis) Order Set                                                  |                             |          |

**MEDICATIONS FOR VASCULAR ACCESS**

| MEDICATION NAME                                              | DOSE                            | ROUTE                         | FREQUENCY                            | INSTRUCTIONS                                              |
|--------------------------------------------------------------|---------------------------------|-------------------------------|--------------------------------------|-----------------------------------------------------------|
| <input checked="" type="checkbox"/> Lidocaine 4% Cream (LMX) | 1 Application (Dispense 1 tube) | Topical-skin (procedure site) | PRN venipuncture (max every 2 hours) | Apply 30 minutes before procedure with occlusive dressing |

**MEDICATION ORDERS**

| MEDICATION NAME (GENERIC PREFERRED)                    | DEFAULT (REFERENCE)          | DOSE   | ROUTE (PICK ONE) | FREQUENCY                  | DURATION | PRIORITY | INSTRUCTIONS       |
|--------------------------------------------------------|------------------------------|--------|------------------|----------------------------|----------|----------|--------------------|
| <input checked="" type="checkbox"/> Methylprednisolone | 30 mg/kg/dose (Max: 1000 mg) | 1000mg | IV               | Once Daily for _____ doses |          |          | Infuse over 1 hour |

**OTHER ORDERS**

| DESCRIPTION                                                                              | INSTRUCTIONS  |
|------------------------------------------------------------------------------------------|---------------|
| <input checked="" type="checkbox"/> Please schedule next clinic appointment for infusion | _____ week(s) |

-----DO NOT WRITE BELOW THIS LINE – IF YOU NEED ADDITIONAL ORDERS, PLEASE USE PHYSICIAN ORDER SHEET-----

Print Name \_\_\_\_\_ Ordering Practitioner's Signature \_\_\_\_\_ Date/Time \_\_\_\_\_ Beeper Number \_\_\_\_\_

\_\_\_\_\_  
Licensed Independent Practitioner Initials (Prescriber)      RN SIGNATURE DATE/TIME

**RHEUMATOLOGY N-Acetylcysteine INFUSION ORDERS # \_\_\_\_**

1. Attending MD: \_\_\_\_\_
2. Diagnosis: \_\_\_\_ Crest syndrome (ICD9-710.9) \_\_\_\_\_
3. Weight: \_\_51.1\_\_ kg Height: \_\_141.8\_\_ cm
4. Vital Signs q15 min X 4, then q30 min X 2, then qh.
5. Notify MD for: SBP less than \_\_90\_\_ or greater than \_\_150\_\_  
DBP less than \_\_50\_\_ or greater than \_\_90\_\_
  
6. Medications:
  - N-Acetylcysteine \_\_\_\_\_ mg (\_\_15mg/kg/hr\_\_) IV  
diluted in 500ml of D5 ½ NS to run over 5 hours (100ml/hr).
  
  - Return for next infusion in \_\_\_\_\_ week/s.

Signature \_\_\_\_\_

Date/Time: \_\_\_\_\_

**RHEUMATOLOGY PAMIDRONATE INFUSION # \_\_\_\_**

Attending MD: \_\_\_\_\_

1. Diagnosis: \_\_\_\_\_
  2. Vital signs and weight prior to infusion; Temp. and **BP** every 30 minutes during infusion
  3. **Labs:** Ionized calcium, osteocalcin, alkaline phosphatase,  
\*\* Ionized calcium level at end of infusion
  4. IV to Hep lock. LMX cream or equivalent prior to insertion PRN.
  5. Diet: regular
  6. During infusion, patient may be up only to void.
  7. **Medication: Pamidronate** \_\_\_\_ \_\_\_\_ (1.5mg/kg mixed with NS, max 90mg) and infuse over 4 hours.
  8. Notify MD for Adverse reactions including:  
Altered vital signs, difficulty breathing, HR > 100, Temp. > 101
  9. Patient may be discharged home after infusion completed, **must have normal calcium level verified by Attending MD and vital signs stable.**  
**\*\* Notify Attending MD when infusion completed and Calcium level post infusion drawn.**
- Return for next infusion in 3 months for Pamidronate # \_\_\_\_\_.

Signature \_\_\_\_\_ / \_\_\_\_\_  
Date/Time: \_\_\_\_\_

# RHEUMATOLOGY RITUXIMAB (Rituxan) INFUSION ORDERS # \_\_\_\_\_

|                       |             |              |               |
|-----------------------|-------------|--------------|---------------|
| Date: ___ / ___ / ___ | Time: _____ | Dose # _____ | Round # _____ |
|-----------------------|-------------|--------------|---------------|

### MEASUREMENTS

|                                                                                                                                                                                                                                                                                                      |                                              |                                                                                                                                                                                                                                                                                  |                                              |                 |
|------------------------------------------------------------------------------------------------------------------------------------------------------------------------------------------------------------------------------------------------------------------------------------------------------|----------------------------------------------|----------------------------------------------------------------------------------------------------------------------------------------------------------------------------------------------------------------------------------------------------------------------------------|----------------------------------------------|-----------------|
| Admit Wt: _____ Kg                                                                                                                                                                                                                                                                                   | <input checked="" type="checkbox"/> Measured | Ht: _____ Cm                                                                                                                                                                                                                                                                     | <input checked="" type="checkbox"/> Measured | BSA (m2): _____ |
| <ul style="list-style-type: none"> <li>Items with boxes must be checked to be ordered</li> <li>Strike thru must be thru entire line and must be initialed by the physician to be valid.</li> <li>The following abbreviations CANNOT be used:<br/><b>cc u IU q.d. q.o.d. MS MS04 MgSO4</b></li> </ul> |                                              | <ul style="list-style-type: none"> <li>CANNOT use trailing Zero (X.0 mg) or Leading decimal point (.X mg) (always use a leading zero)</li> <li>The metric system must be used to enter all medication orders</li> <li>All pages of order set MUST be sent to Pharmacy</li> </ul> |                                              |                 |

### ALLERGIES/SENSITIVITIES

|                                             |                                          |                                            |                                           |
|---------------------------------------------|------------------------------------------|--------------------------------------------|-------------------------------------------|
| <input type="checkbox"/> No Known Allergies | <input type="checkbox"/> Latex Allergies | <input type="checkbox"/> Latex Precautions | <input type="checkbox"/> Unable to Obtain |
| <b>Agent</b>                                |                                          | <b>Reaction(s)/Notes</b>                   |                                           |
| 1. _____                                    |                                          | _____                                      |                                           |
| 2. _____                                    |                                          | _____                                      |                                           |
| <b>Other:</b> _____                         |                                          |                                            |                                           |

### INDICATION FOR USE OF THIS ORDER SET – Rituximab (Rituxan®)

|                   |                |
|-------------------|----------------|
| Indication: _____ | ICD 10 - _____ |
|-------------------|----------------|

### PRESCRIBER RESTRICTIONS/INFORMATION

|                                                    |
|----------------------------------------------------|
| <b>Labs to be drawn prior to start of infusion</b> |
|----------------------------------------------------|

### VITALS

|                                     | DESCRIPTION                       | FREQUENCY                                                                                                                   | NOTIFY PRESCRIBER                                                                                                                                               | INSTRUCTIONS |
|-------------------------------------|-----------------------------------|-----------------------------------------------------------------------------------------------------------------------------|-----------------------------------------------------------------------------------------------------------------------------------------------------------------|--------------|
| <input checked="" type="checkbox"/> | Vital Signs (Pulse, Respirations) | <input checked="" type="checkbox"/> Every 15 minutes x 4, then every hour during infusion<br><input type="checkbox"/> _____ | <input type="checkbox"/> HR greater than _____ or less than _____<br><input type="checkbox"/> RR greater than _____ or less than _____                          |              |
| <input checked="" type="checkbox"/> | Temperature                       | <input checked="" type="checkbox"/> Every 15 minutes x 4, then every hour during infusion<br><input type="checkbox"/> _____ | <input type="checkbox"/> Temp less than _____<br><input checked="" type="checkbox"/> Temp greater than _101__                                                   |              |
| <input checked="" type="checkbox"/> | Blood Pressure                    | <input checked="" type="checkbox"/> Every 15 minutes x 4, then every hour during infusion<br><input type="checkbox"/> _____ | <input checked="" type="checkbox"/> SBP greater than _150__ or less than _90__<br><input checked="" type="checkbox"/> DBP greater than _90__ or less than _50__ |              |

### NURSING ORDERS

|                                     | DESCRIPTION                                          | INSTRUCTIONS                                                    |
|-------------------------------------|------------------------------------------------------|-----------------------------------------------------------------|
| <input checked="" type="checkbox"/> | Notify Prescriber                                    | For suspected medication reaction or if patient loses IV access |
| <input checked="" type="checkbox"/> | Please schedule next clinic appointment for infusion | _____ week(s)                                                   |

### VASCULAR ACCESS

|                                     | VASCULAR ACCESS                                                                                       | INSTRUCTIONS                | COMMENTS |
|-------------------------------------|-------------------------------------------------------------------------------------------------------|-----------------------------|----------|
| <input checked="" type="checkbox"/> | Peripheral IV <input checked="" type="checkbox"/> Insert <input checked="" type="checkbox"/> Maintain | Saline lock when not in use |          |
| <input type="checkbox"/>            | <b>See Supportive Care Central Line (Excluding Dialysis) Order Set</b>                                |                             |          |

### MEDICATIONS FOR VASCULAR ACCESS

|                                     | MEDICATION NAME          | DOSE                            | ROUTE                         | FREQUENCY                            | INSTRUCTIONS                                              |
|-------------------------------------|--------------------------|---------------------------------|-------------------------------|--------------------------------------|-----------------------------------------------------------|
| <input checked="" type="checkbox"/> | Lidocaine 4% Cream (LMX) | 1 Application (Dispense 1 tube) | Topical-skin (procedure site) | PRN venipuncture (max every 2 hours) | Apply 30 minutes before procedure with occlusive dressing |

\_\_\_\_\_ Licensed Independent Practitioner Initials (Prescriber)
 \_\_\_\_\_ RN SIGNATURE DATE/TIME
1 of 3



# \*DT0077\*

## MEDICATION ORDER

RITUXIMAB  
(RITUXAN®) INFUSION ALL

Form#0040

### STANDARD ADMINISTRATION TIMES

Daily 0800                      Nightly 2100  
Twice a day 0800-2000      Three times a day 0800-1400-2000  
Every 12 hours 0800-2000    Four times a day 0800-1200-1600-2000

Every 3 hours 0000-0300-0600-0900-1200-1500-1800-2100  
Every 4 hours 0000-0400-0800-1200-1600-2000  
Every 6 hours 0200-0800-1400-2000  
Every 8 hours 0000-0800-1600

### PRE-MEDICATION ORDERS

|                                     | MEDICATION NAME<br>(GENERIC PREFERRED) | DEFAULT<br>(REFERENCE)                       | DOSE | ROUTE                                                                 | FREQUENCY | DURATION | PRIORITY | INSTRUCTIONS<br>(IF PRN – INDICATION IS<br>REQUIRED)                                   |
|-------------------------------------|----------------------------------------|----------------------------------------------|------|-----------------------------------------------------------------------|-----------|----------|----------|----------------------------------------------------------------------------------------|
| <input type="checkbox"/>            | Methylprednisolone<br>(Solumedrol®)    | 1-2mg/kg/dose<br>(Max: 100<br>mg/dose)       |      | IV                                                                    | Once      |          |          | Give 30 minutes prior to<br>infusion<br>**Not for use as high-dose<br>pulse infusion** |
| <input checked="" type="checkbox"/> | Acetaminophen                          | 10-15<br>mg/kg/dose<br>(Max: 650<br>mg/dose) |      | PO                                                                    | Once      |          |          | Give 30 minutes prior to<br>infusion                                                   |
| <input checked="" type="checkbox"/> | Diphenhydramine                        | 0.5-1<br>mg/kg/dose<br>(Max: 50<br>mg/dose)  |      | <input checked="" type="checkbox"/> PO<br><input type="checkbox"/> IV | Once      |          |          | Give 30 minutes prior to<br>infusion                                                   |

See Methylprednisolone Pulse Infusion Order Set – if applicable

### EMERGENCY MEDICATION ORDERS

|                                     |                                                                                                          |                                                                           |                                                                                                              |                                                                       |          |  |  |                                                                                             |
|-------------------------------------|----------------------------------------------------------------------------------------------------------|---------------------------------------------------------------------------|--------------------------------------------------------------------------------------------------------------|-----------------------------------------------------------------------|----------|--|--|---------------------------------------------------------------------------------------------|
| <input checked="" type="checkbox"/> | Epinephrine<br>1:1,000                                                                                   | 0.01 mg/kg/<br>dose (0.01<br>mL/kg/dose)<br>Max dose: 0.5<br>mg or 0.5 mL |                                                                                                              | IM                                                                    | Once PRN |  |  | * For treatment of<br>anaphylaxis reactions<br>with Rituximab<br>**Must notify prescriber** |
| <input checked="" type="checkbox"/> | Epinephrine 1:1000<br>(EPIPEN® - 0.3mg,<br>EPIPEN JR® -<br>0.15mg)<br>**Reserved for<br>outpatient use** |                                                                           | <input type="checkbox"/> 0.15 mg<br>(10-25 kg)<br><input type="checkbox"/> 0.3 mg<br>(Greater<br>than 25 kg) | IM                                                                    | Once PRN |  |  | * For treatment of<br>anaphylaxis reactions<br>with Rituximab<br>**Must notify prescriber** |
| <input checked="" type="checkbox"/> | Diphenhydramine                                                                                          | 0.5-1<br>mg/kg/dose<br>(Max: 50<br>mg/dose)                               |                                                                                                              | <input checked="" type="checkbox"/> IV<br><input type="checkbox"/> IM | Once PRN |  |  | * For treatment of<br>anaphylaxis reactions<br>with Rituximab.                              |
| <input checked="" type="checkbox"/> | Hydrocortisone                                                                                           | 2 mg/kg/dose<br>(Max: 150<br>mg/dose)                                     |                                                                                                              | IV                                                                    | Once PRN |  |  | * For treatment of<br>anaphylaxis reactions<br>with Rituximab.                              |

### RITUXIMAB INFUSION

|                                     |                         |                                                                                                                                    |  |    |      |  |  |                                                                                                         |
|-------------------------------------|-------------------------|------------------------------------------------------------------------------------------------------------------------------------|--|----|------|--|--|---------------------------------------------------------------------------------------------------------|
| <input checked="" type="checkbox"/> | Rituximab<br>(Rituxan®) | <input type="checkbox"/> 375mg/m <sup>2</sup><br><input checked="" type="checkbox"/> 750mg/m <sup>2</sup><br>(Max:<br>1000mg/dose) |  | IV | Once |  |  | Pharmacy note: Dilute in<br>NS (Max conc: 4mg/ml)<br><br>***See Below for Infusion<br>Instructions. *** |
|-------------------------------------|-------------------------|------------------------------------------------------------------------------------------------------------------------------------|--|----|------|--|--|---------------------------------------------------------------------------------------------------------|

### INFUSION AND ADMINISTRATION INSTRUCTIONS

Start infusion: 0.25mL/kg/hr = \_\_\_\_\_ mL/hr (max of 25mL/hr) for 1<sup>st</sup> hour

If no hypersensitivity: Increase infusion by increments of 0.25mL/kg/hr = \_\_\_\_\_ mL/hr (max increase of 25mL/hr) every 30 minutes to

final infusion rate of 100mL/hr  
 For hypersensitivity event, stop infusion and notify prescriber  
**Stop infusion immediately for bronchospasm or hypotension and notify prescriber**  
 Upon improvement of hypersensitivity symptoms, prescriber may resume infusion at 50% of previous rate

|                                                                 |                        |        |
|-----------------------------------------------------------------|------------------------|--------|
| Licensed Independent Practitioner Initials (Prescriber)         | RN SIGNATURE DATE/TIME | 2 of 3 |
| *DT0077*                                                        |                        |        |
| <b>MEDICATION ORDER</b><br>RITUXIMAB<br>(RITUXAN®) INFUSION ALL |                        |        |
| Form#0040                                                       |                        |        |

| STANDARD ADMINISTRATION TIMES        |                                                       |
|--------------------------------------|-------------------------------------------------------|
| Daily 0800                           | Every 3 hours 0000-0300-0600-0900-1200-1500-1800-2100 |
| Twice a day 0800-2000                | Every 4 hours 0000-0400-0800-1200-1600-2000           |
| Every 12 hours 0800-2000             | Every 6 hours 0200-0800-1400-2000                     |
| Nightly 2100                         | Every 8 hours 0000-0800-1600                          |
| Three times a day 0800-1400-2000     |                                                       |
| Four times a day 0800-1200-1600-2000 |                                                       |

| LABS                                |                                            |          |           |          |                                    |
|-------------------------------------|--------------------------------------------|----------|-----------|----------|------------------------------------|
|                                     | NAME OF TEST                               | PRIORITY | FREQUENCY | DURATION | INSTRUCTIONS/PRN INDICATIONS       |
| <input checked="" type="checkbox"/> | Complete Blood Count with Differential     | Routine  | Once      |          | Obtain prior to start of infusion. |
| <input checked="" type="checkbox"/> | Comprehensive Metabolic Panel              | Routine  | Once      |          | Obtain prior to start of infusion. |
| <input checked="" type="checkbox"/> | C-Reactive Protein                         | Routine  | Once      |          | Obtain prior to start of infusion. |
| <input checked="" type="checkbox"/> | Erythrocyte Sedimentation Rate             | Routine  | Once      |          | Obtain prior to start of infusion. |
| <input checked="" type="checkbox"/> | CD 19/20 (B-cell lymphocyte subtype level) | Routine  | Once      |          | Obtain prior to start of infusion. |

| OTHER ORDERS             |              |
|--------------------------|--------------|
| DESCRIPTION              | INSTRUCTIONS |
| <input type="checkbox"/> |              |
| <input type="checkbox"/> |              |

-----DO NOT WRITE BELOW THIS LINE – IF YOU NEED ADDITIONAL ORDERS, PLEASE USE PHYSICIAN ORDER SHEET-----

\_\_\_\_\_  
 Print Name                                      Ordering Practitioner's Signature                                      Date/Time                                      Beeper Number

\_\_\_\_\_  
 Licensed Independent Practitioner Initials (Prescriber)                                      RN SIGNATURE DATE/TIME                                      3 of 3
